# Supplementary material for: Variation in Ventilator Allocation Guidelines by US State During the Coronavirus Disease 2019 Pandemic: A Systematic Review
Source: PubMed Central journal article supplement (PMC7305526; doi:10.1001/jamanetworkopen.2020.12606), 2020-06-19
Supplement: jamanetwopen-3-e2012606-s001.pdf [file jamanetwopen-3-e2012606-s001.pdf]

## Supplementary Online Content

Piscitello GM, Kapania EM, Miller WD, Rojas JC, Siegler M, Parker WF. Variation in ventilator allocation guidelines by US state during the coronavirus disease 2019 pandemic: a systematic review. *JAMA Netw Open*. 2020;3(6):e2012606. doi:10.1001/jamanetworkopen.2020.12606

**eAppendix 1.** Supplementary Methods

**eAppendix 2.** State Ventilator Allocation Documents for Adults and Pediatric Patients Meeting Study Inclusion Criteria

**eFigure 1.** Identification of US State Ventilator Allocation Protocols Meeting Inclusion Criteria

**eFigure 2.** Ventilator Allocation Specific Guidance by US State

**eFigure 3.** Withdrawal of Mechanical Ventilation Discussed for Adults

**eFigure 4.** Triage Committee for Adults

**eFigure 5.** Allocation Protocol for Pediatric Patients

**eTable 1.** Specific Adult Exclusion Criteria

**eTable 2.** Age of Pediatric Patients Per State Guidelines

**eTable 3.** Pediatric Scoring Systems

**eTable 4.** Pediatric Patients Triaged With Adults

**eTable 5.** Exclusion Criteria for Patients Younger Than 18 Years

**eTable 6.** Withdrawal from Mechanical Ventilation Discussed for Pediatric Patients

This supplementary material has been provided by the authors to give readers additional information about their work.

## eAppendix 1. Supplementary Methods

### Syntaxes Used in Internet Search:

| Search Engine                                                          | Search Strategy                                                                                                                            |
|------------------------------------------------------------------------|--------------------------------------------------------------------------------------------------------------------------------------------|
| Google Search                                                          | ventilator OR ventilator allocation OR allocation OR ventilator triage OR triage OR scarce resource OR crisis standard OR health emergency |
| U.S. State Department of Health or Department of Public Health Website | ventilator OR ventilator allocation OR allocation OR ventilator triage OR triage OR scarce resource OR crisis standard OR health emergency |

Search Strategy and Results for Google Search for the State of Colorado Ventilator Allocation Guidelines. No limits were used in search.

Dates of Search: All information sources were searched between March 30-April 2 and May 8-May 10, 2020.

No review protocol was created for evaluation of each state protocol. Our entire study design and search criteria are explained in our methods section on page 5-6 of the manuscript and this eMethods section.

Additional Studies: To be provided with a list of all screened protocols, please email Gina\_Piscitello@rush.edu.

## **eAppendix 2. State Ventilator Allocation Documents for Adults and Pediatric Patients Meeting Study Inclusion Criteria**

### **Alaska**

State of Alaska. Patient Care Strategies for Scarce Resource Situations [Internet]. 2020 [cited 2020 Apr 2]; Available from: [http://dhss.alaska.gov/dph/Epi/id/SiteAssets/Pages/HumanCoV/SOA\\_DHSS\\_CrisisStandardsOfCare.pdf](http://dhss.alaska.gov/dph/Epi/id/SiteAssets/Pages/HumanCoV/SOA_DHSS_CrisisStandardsOfCare.pdf)

### **Arizona**

Arizona Department of Health Services. Arizona Crisis Standards of Care Plan. A Comprehensive and Compassionate Response. 2nd Edition. [Internet]. 2018 [cited 2020 May 8]; Available from: <https://www.azdhs.gov/documents/preparedness/emergency-preparedness/response-plans/azcsc-plan.pdf>

### **California**

California Department of Public Health. Standards and Guidelines for Healthcare Surge During Emergencies - Foundational Knowledge [Internet]. [cited 2020 May 8]; Available from: [http://www.cidrap.umn.edu/sites/default/files/public/php/258/258\\_foundation.pdf](http://www.cidrap.umn.edu/sites/default/files/public/php/258/258_foundation.pdf)

### **Colorado**

Subject Matter Experts Advisor Panel for the Governors Expert Emergency Epidemic Response Committee. Crisis Standards of Care Guidelines for Hospitals for the COVID-19 Pandemic [Internet]. 2020 [cited 2020 May 10] ; Available from: <https://www.colorado.gov/pacific/sites/default/files/Crisis%20Standards%20of%20Care%20Triage%20Standards-April%202020.pdf>

### **Connecticut**

Standards of Care Workgroup CT Department of Public Health. Standards of Care: Providing Health Care During A Prolonged Public Health Emergency [Internet]. 2010 [cited 2020 May 8]; Available from: <https://portal.ct.gov/-/media/Departments-and-Agencies/DPH/dph/legal/StandardsofCarefinalpdf.pdf?la=en>

### **Illinois**

State of Illinois - Illinois Department of Public Health. Guidelines on Emergency Preparedness for Hospitals During COVID-19 [Internet]. 2020 [cited 2020 May 8]. Available from: <https://www.dph.illinois.gov/sites/default/files/Guidelines%20on%20Emergency%20Preparedness.pdf>

## **Indiana**

Indiana State Department of Health Crisis Standards of Care Community Advisory Group. Crisis Standards of Patient Care Guidance with an Emphasis on Pandemic Influenza: Triage and Ventilator Allocation Guidelines [Internet]. 2014 [cited 2020 May 8]; Available from:

[https://www.in.gov/isdh/files/Crisis\\_Standards\\_of\\_Care\\_signed\\_41814.pdf](https://www.in.gov/isdh/files/Crisis_Standards_of_Care_signed_41814.pdf)

## **Iowa**

The Iowa Pandemic Influenza Ethics Committee. An Ethical Framework for Use in a Pandemic [Internet]. 2008 [cited 2020 May 8]; Available from:

[http://publications.iowa.gov/17889/1/panflu\\_ehtical\\_guidelines\\_manual.pdf](http://publications.iowa.gov/17889/1/panflu_ehtical_guidelines_manual.pdf)

## **Kansas**

Kansas Department of Health and Environment. Toolkit for COVID-19 [Internet]. 2020 [cited 2020 May 8]; Available from: <https://int.nyt.com/data/documenthelper/6847-kansas-triage-guidelines/02cb4c58460e57ea9f05/optimized/full.pdf#page=1>

## **Louisiana**

Louisiana Department of Health & Hospitals. ESF-8 Health & Medical Section State Hospital Crisis Standard of Care Guidelines in Disasters Version 14.0 [Internet]. 2018 [cited 2020 May 8]; Available from:

<https://cdn.ymaws.com/www.lhaonline.org/resource/resmgr/imported/Louisiana%20CSOC%20Guidelines%20in%20Disasters.pdf>

## **Maryland**

Daugherty-Biddison L, Gwon H, Regenber A, Schoch-Spana M, Toner E. Maryland Framework for the Allocation of Scarce Life-sustaining Medical Resources in a Catastrophic Public Health Emergency [Internet]. 2017 [cited 2020 May 8]; Available from:

[https://www.law.umaryland.edu/media/SOL/pdfs/Programs/Health-Law/MHECN/ASR%20Framework\\_Final.pdf](https://www.law.umaryland.edu/media/SOL/pdfs/Programs/Health-Law/MHECN/ASR%20Framework_Final.pdf)

## **Massachusetts**

The Commonwealth of Massachusetts Department of Public Health. Crisis Standards of Care Planning Guidance for the COVID-19 Pandemic [Internet]. 2020 [cited 2020 May 8]. Available from: <https://www.documentcloud.org/documents/6843353-Revised-Crisis-Standards-of-Care-Planning-Guidance.html>

## **Michigan**

State of Michigan Department of Community Health Office of Public Health Preparedness. Guidelines for Ethical Allocation of Scarce Medical Resources and Services During Public Health Emergencies in Michigan Version 2.0 [Internet]. 2012 [cited 2020 May 8]; Available from: <http://www.mimedicaethics.org/Documentation/Michigan%20DCH%20Ethical%20Scarce%20Resources%20Guidelines%20v2%20rev%20Nov%202012.0.pdf>

### **Michigan Pediatric Protocol**

Michigan Department of Health & Human Services. Planning for Children in Disasters: A Hospital Toolkit [Internet]. 2016 [cited 2020 May 8]; Available from: [https://www.michigan.gov/documents/mdch/Planning\\_for\\_Children\\_in\\_Disasters\\_15\\_495237\\_7.pdf](https://www.michigan.gov/documents/mdch/Planning_for_Children_in_Disasters_15_495237_7.pdf)

### **Minnesota**

Minnesota Department of Health. Patient Care Strategies for Scarce Resource Situations [Internet]. 2019 [cited 2020 May 8]; Available from: <https://www.health.state.mn.us/communities/ep/surge/crisis/standards.pdf>

### **Nevada**

Nevada Division of Public and Behavioral Health. Developing a Standard of Healthcare During Catastrophic Public Health Emergencies [Internet]. 2017 [cited 2020 May 8]; Available from: <https://files.asprtracie.hhs.gov/documents/nv-csc-plan-070317--final-508.pdf>

### **New Mexico**

New Mexico Department of Health. New Mexico Crisis Standards of Care [Internet]. 2018 [cited 2020 May 8]; Available from: <https://nmhealth.org/publication/view/plan/4877/>

### **New York**

New York State Task Force on Life and the Law and the Law New York State Department of Health. Ventilator Allocation Guidelines [Internet]. 2015 [cited 2020 May 8]; Available from: [https://www.health.ny.gov/regulations/task\\_force/reports\\_publications/docs/ventilator\\_guidelines.pdf](https://www.health.ny.gov/regulations/task_force/reports_publications/docs/ventilator_guidelines.pdf)

### **North Carolina**

North Carolina Institute of Medicine in collaboration with the North Carolina Department of Health and Human Services, Division of Public Health. Stockpiling Solutions: North Carolina's Ethical Guidelines for an Influenza Pandemic [Internet]. 2007 [cited 2020 May

8]; Available from:

[http://www.cidrap.umn.edu/sites/default/files/public/php/230/230\\_report.pdf](http://www.cidrap.umn.edu/sites/default/files/public/php/230/230_report.pdf)

## **Oklahoma**

Oklahoma State Department of Health. Hospital Crisis Standards of Care (Draft) [Internet]. Revised 4/7/2020 [cited 2020 May 8]; Available from:

<https://www.ok.gov/health2/documents/Hospital%20Crisis%20Standards%20of%20Care.pdf>

## **Oregon**

Oregon Health Authority et. al. Oregon Crisis Care Guidance [Internet]. 2018 [cited 2020 May 8]; Available from: <https://www.theoma.org/CrisisCare>

## **Pennsylvania**

Pennsylvania Department of Health. Interim Pennsylvania Standards of Care for Pandemic Guidelines Version 2 [Internet]. April 10, 2020 [cited 2020 May 8]; Available from:

<https://www.health.pa.gov/topics/Documents/Diseases%20and%20Conditions/COVID-19%20Interim%20Crisis%20Standards%20of%20Care.pdf>

## **South Carolina**

South Carolina Pandemic Influenza Ethics Task Force. South Carolina Prepares for Pandemic Influenza: An Ethical Perspective [Internet]. 2009 [cited 2020 May 8]; Available from: <https://www.scdhec.gov/sites/default/files/Library/CR-009538.pdf>

## **Tennessee**

Tennessee Altered Standards of Care Workgroup. Guidance for the Ethical Allocation of Scarce Resources during a Community-Wide Public Health Emergency as Declared by the Governor of Tennessee Version 1.6 [Internet]. 2016 [cited 2020 Mar 10]; Available from: <https://int.nyt.com/data/documenthelper/6851-tennessee-triage-guidelines/02cb4c58460e57ea9f05/optimized/full.pdf>

## **Utah**

Utah Department of Health and Utah Hospital Association. Utah Crisis Standards of Care Guidelines Version 2 [Internet]. 2018 [cited 2020 May 8]; Available from:

[https://health.utah.gov/wp-content/uploads/Final\\_Utah\\_Crisis\\_Standards\\_of\\_Care\\_011719-1.pdf](https://health.utah.gov/wp-content/uploads/Final_Utah_Crisis_Standards_of_Care_011719-1.pdf)

## **Vermont**

Vermont Department of Health. Vermont Crisis Standard of Care Plan Version 1.0 [Internet]. 2019 [cited 2020 Mar 30]; Available from: <https://www.healthvermont.gov/sites/default/files/documents/pdf/VT%20CSC%20Plan%2007-23-2019%20Final.pdf>

## **Washington**

Washington State Department of Health. Scarce Resource Management & Crisis Standards of Care [Internet]. 2020 [cited 2020 May 8]; Available from: <https://int.nyt.com/data/documenthelper/6853-washington-state-triage-guidel/02cb4c58460e57ea9f05/optimized/full.pdf#page=1>

**eFigure 1.** Identification of US State Ventilator Allocation Protocols Meeting Inclusion Criteria

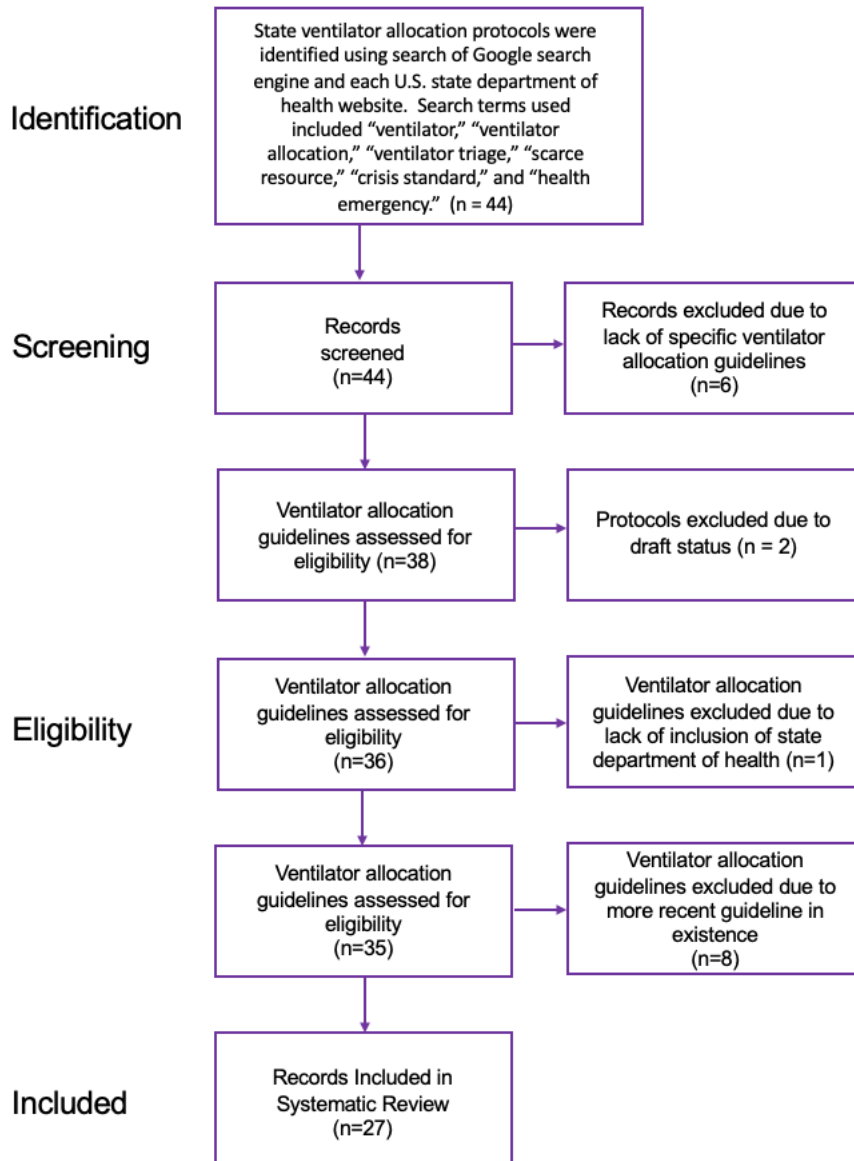



**eFigure 2.** Ventilator Allocation Specific Guidance by US States

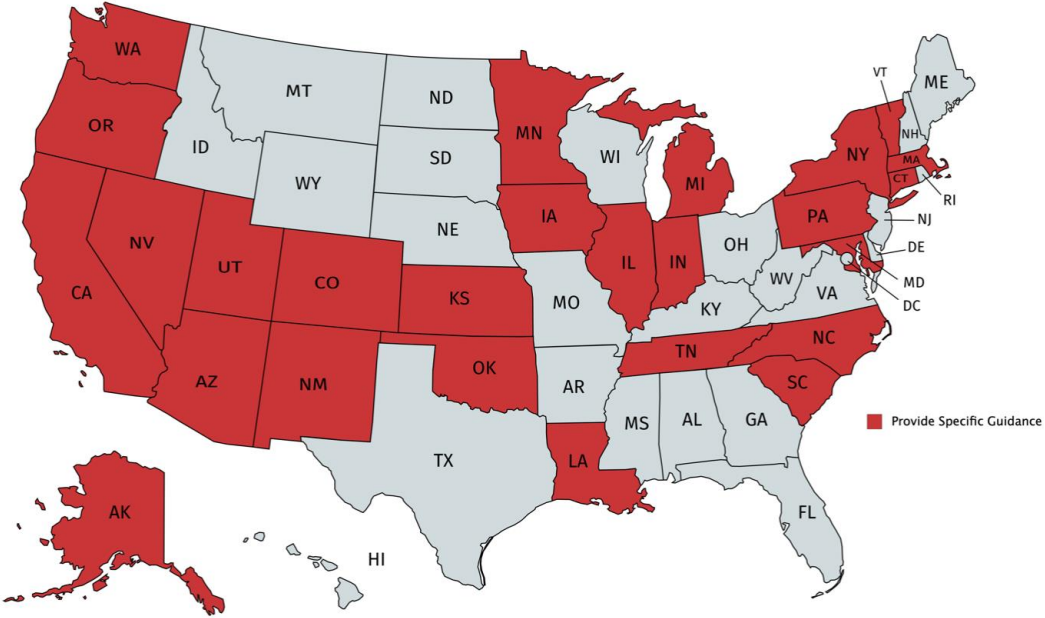

**eFigure 3.** Withdrawal of Mechanical Ventilation Discussed for Adults

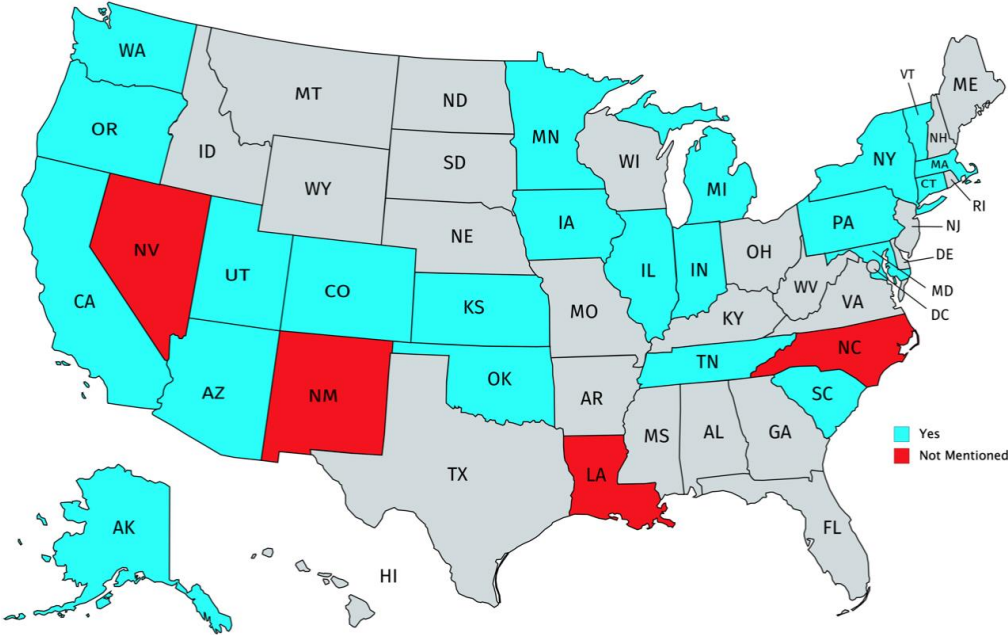

eFigure 4. Triage Committee for Adults

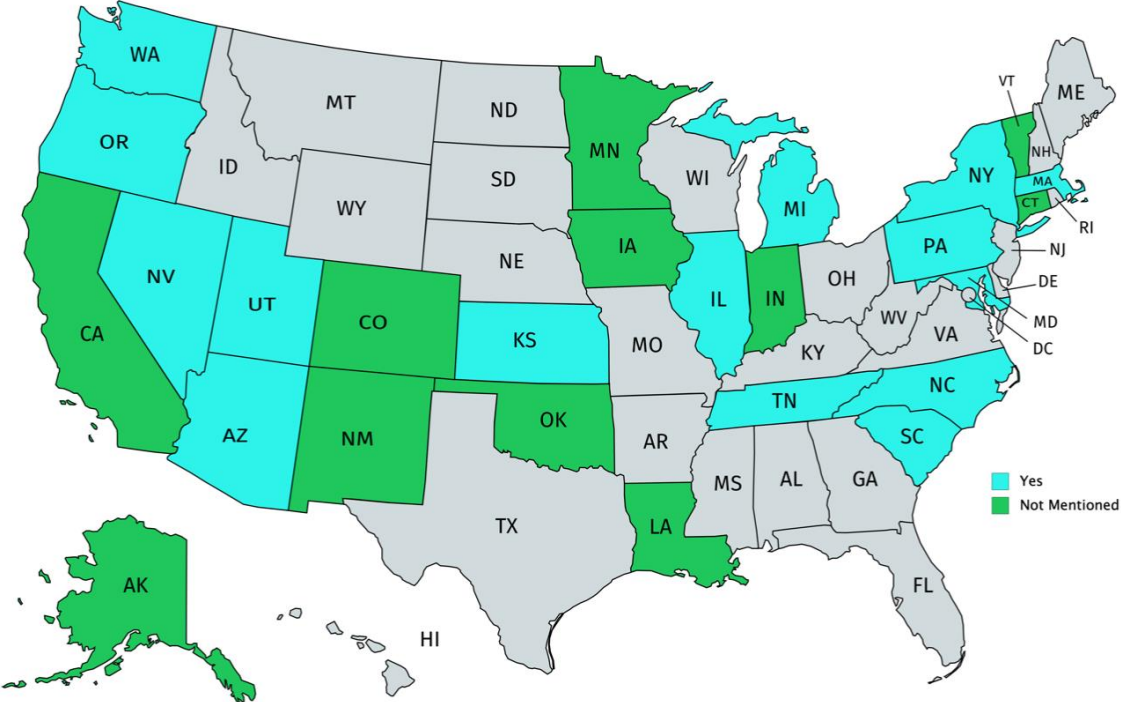

eFigure 5. Allocation Protocol for Pediatric Patients

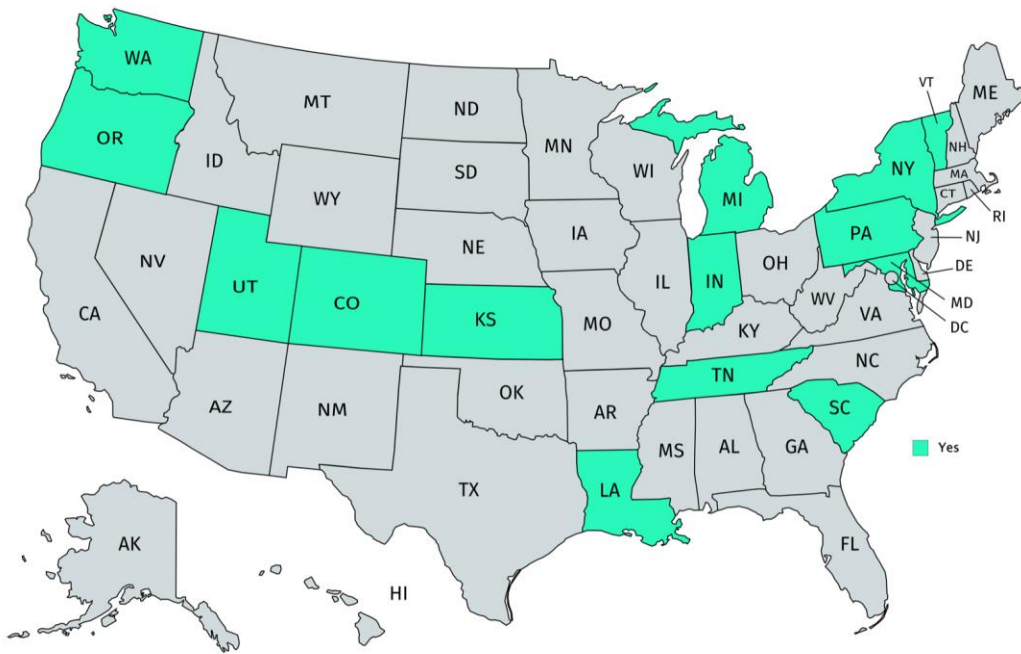

**eTable 1.** Specific Adult Exclusion Criteria

| <b>Diagnosis</b>                                               | <b>Number of States with Criteria</b> |
|----------------------------------------------------------------|---------------------------------------|
| Severe burns                                                   | 10                                    |
| Cardiac arrest not responsive to advanced cardiac life support | 9                                     |
| End stage heart disease                                        | 9                                     |
| End stage liver disease                                        | 9                                     |
| End stage lung disease                                         | 8                                     |
| Irreversible severe neurologic injury or disease               | 8                                     |
| Metastatic malignancy                                          | 8                                     |
| Severe trauma                                                  | 5                                     |
| Severe dementia                                                | 3                                     |
| End stage renal disease (dialysis dependent)                   | 4                                     |
| Terminal condition with life expectancy < 6 Months             | 4                                     |
| Advanced untreatable neuromuscular disease                     | 4                                     |
| Age >90                                                        | 1                                     |

**eTable 2.** Age of Pediatric Patients Per State Guidelines

| <b>Age</b>         | <b>Number of States</b> |
|--------------------|-------------------------|
| Less than Age 18   | 7                       |
| Age 14 or Younger  | 2                       |
| Less than Age 14   | 1                       |
| Less than Age 12   | 1                       |
| 2 months to Age 12 | 1                       |
| Age 2 to Age 12    | 1                       |
| Age Not Specified  | 1                       |

**eTable 3.** Pediatric Scoring Systems

| <b>Score</b>               | <b>Number of States</b> |
|----------------------------|-------------------------|
| Clinical Judgment          | 2                       |
| PELOD                      | 2                       |
| mSOFA or Clinical Judgment | 1                       |
| PELOD                      | 1                       |
| PELOD 2                    | 1                       |
| PELOD + Comorbidities      | 1                       |
| PELOD 2 + Comorbidities    | 1                       |
| SOFA                       | 1                       |
| Score Not Specified        | 4                       |

Pediatric Logistic Organ Dysfunction (PELOD), Modified Sequential Organ Failure Assessment (mSOFA), Sequential Organ Failure Assessment (SOFA)

**eTable 4.** Pediatric Patients Triaged With Adults

| <b>Yes</b>    | <b>Age of Pediatric Patients that Can be Triaged with Adults</b> |
|---------------|------------------------------------------------------------------|
| Colorado      | Less than Age 18                                                 |
| Indiana       | 2 Months to Age 12                                               |
| Massachusetts | Less than Age 18                                                 |
| New York      | Less than Age 18                                                 |
| Tennessee     | 14 and Older                                                     |
| Vermont       | Age 2 and Older                                                  |
| Oregon        | No Age Specified                                                 |



**eTable 5.** Exclusion Criteria for Patients Younger Than 18 Years

| <b>Have Exclusion Criteria</b> |
|--------------------------------|
| Indiana                        |
| Kansas                         |
| Maryland                       |
| Massachusetts                  |
| Michigan                       |
| New York                       |
| Oregon                         |
| Utah                           |
| Vermont                        |
| Washington                     |

**eTable 6.** Withdrawal from Mechanical Ventilation Discussed for Pediatric Patients

| <b>Yes</b>    | <b>Special Requirements</b>                                     |
|---------------|-----------------------------------------------------------------|
| Colorado      | Can consider after 14-21 days on mechanical ventilatory support |
| Indiana       | Can consider after 120 hours on mechanical ventilatory support  |
| Kansas        | -                                                               |
| Maryland      | -                                                               |
| Massachusetts | -                                                               |
| Michigan      | -                                                               |
| New York      | -                                                               |
| Oregon        | -                                                               |
| Washington    | -                                                               |
